1 Characterisation of acetogen  
2 formatotrophic potential using *E.*  
3 *limosum*  
4

5 Jamin C. Wood,<sup>1</sup> R. Axayacatl Gonzalez-Garcia,<sup>2</sup> Dara Daygon,<sup>2,3</sup> Gert Talbo,<sup>2,3</sup> Manuel R. Plan,<sup>2,3</sup>

6 Esteban Marcellin,<sup>2,3</sup> and Bernardino Viridis<sup>1,\*</sup>

7 <sup>1</sup> Australian Centre for Water and Environmental Biotechnology (ACWEB, *formerly AWMC*), The  
8 University of Queensland, Brisbane, QLD 4072, Australia.

9 <sup>2</sup> Australian Institute for Bioengineering and Nanotechnology, The University of Queensland,  
10 Brisbane, QLD 4072, Australia.

11 <sup>3</sup> Metabolomics Australia (Queensland node), The University of Queensland, Brisbane, QLD 4072,  
12 Australia.

13 \* Correspondence to:

14 Dr Bernardino Viridis

15 Email: [b.virdis@uq.edu.au](mailto:b.virdis@uq.edu.au)

16

## 17 Key words

18 acetogen; formate; eubacterium limosum; omics; proteomics; metabolomics; chemostat; pyruvate

## 19 Abstract

20 Formate is a promising energy carrier that could be used to transport renewable electricity. Some  
21 acetogenic bacteria, such as *Eubacterium limosum*, have the native ability to utilise formate as a sole  
22 substrate for growth, which has sparked interest in the biotechnology industry. However,  
23 formatrophic metabolism in acetogens is poorly understood, and a systems-level characterization  
24 in continuous cultures is yet to be reported. Here we present the first steady-state dataset for *E.*  
25 *limosum* formatrophic growth. At a defined dilution rate of  $0.4\text{ d}^{-1}$ , there was a high specific uptake  
26 rate of formate ( $280\pm 56\text{ mmol/gDCW/d}$ ), however, most carbon went to  $\text{CO}_2$  ( $150\pm 11$   
27  $\text{mmol/gDCW/d}$ ). Compared to methylotrophic growth, protein differential expression data and  
28 intracellular metabolomics revealed several key features of formate metabolism. Upregulation of  
29 *pta* appears to be a futile attempt of cells to produce acetate as the major product. Instead, a  
30 cellular energy limitation resulted in the accumulation of intracellular pyruvate and upregulation of  
31 *Pfl* to convert formate to pyruvate. Therefore, metabolism is controlled, at least partially, at the  
32 protein expression level, an unusual feature for an acetogen. We anticipate that formate could be an  
33 important one-carbon substrate for acetogens to produce chemicals rich in pyruvate, a metabolite  
34 generally in low abundance during syngas growth.

## 35 Introduction

36 Acetogens hold great promise for sustainable chemical and fuel production whilst closing the carbon  
37 cycle using feedstocks from renewable sources (Ljungdahl 2009). Acetogens can use reducing  
38 equivalents through intermediates such as hydrogen ( $\text{H}_2$ ), carbon monoxide ( $\text{CO}$ ), formate and  
39 methanol. However, compared to synthesis gas fermentation (syngas, a mixture of  $\text{CO}$  and  $\text{H}_2$ ), as

40 has been commercialised by LanzaTech using offgases from the steel industry, much less is known  
41 about the liquid C<sub>1</sub> feedstock, formate (Cotton et al. 2020; Köpke and Simpson 2020).

42 Unlike the other liquid C<sub>1</sub> feedstock methanol, formate can be efficiently produced directly from CO<sub>2</sub>  
43 and renewable electricity without the need for hydrogen (*i.e.* Power-to-X), a technology that is at the  
44 pre-commercialisation stage (Spurgeon and Kumar 2018; Rabiee et al. 2021). Being a liquid, it avoids  
45 many of the transportation issues present with gaseous substrates, as well as fitting with existing  
46 supply chain and fermentation infrastructure (Cotton et al. 2020). It also can overcome key mass  
47 transfer limitations faced by gas fermentation, and have higher energy efficiencies, resulting in lower  
48 operational costs, *e.g.* for like cooling (Cotton et al. 2020). Formate could, in the future, become not  
49 only a biotechnology feedstock, but an energy carrier that avoids the pitfalls of hydrogen such as  
50 non-negligible supply chain leaks leading to additional costs and contribution to global warming as a  
51 result of its GWP over 100 years of 11 (that is, 11 times that of CO<sub>2</sub>) (Al-Breiki and Bicer 2020;  
52 Warwick et al. 2022).

53 Consequently, there have been numerous efforts to engineer formatotrophy into several organisms.  
54 For example, the synthetic reductive glycine pathway has been engineered into *E. coli* (Kim et al.  
55 2020). The so-called FORCE pathway, an orthogonal chain elongation metabolism to biomass based  
56 on formyl-CoA, has also been engineered into *E. coli* (Chou et al. 2021). Despite these advances,  
57 native acetogen formatotrophy has the highest energy efficiency, which may be a critical metric  
58 when considering it as a Power-to-X technology (Wood et al. *In press*; Neuendorf et al. 2021).

59 Utilising the native capabilities of acetogens such as *Eubacterium limosum*, *Butyribacterium*  
60 *methylotrophicum* and *Acetobacterium woodii*, would avoid the need for genetic engineering or  
61 building new gas fermentation infrastructure.

62 Formate as a substrate in the Wood-Ljungdahl Pathway (WLP) is similar to CO metabolism in that  
63 there is excess oxidation to CO<sub>2</sub> in order to generate the required number of reducing equivalents.  
64 We have previously shown for *E. limosum* in batch culture that formate consumption results in

65 acetate and CO<sub>2</sub> production at a stoichiometric ratio of 1:1 (Wood et al. 2021). Interestingly, the  
66 observed native formatotrophic acetogen maximum growth rate was similar to that seen for the  
67 synthetic reduction glycine pathway in *E. coli* (ca. 0.1 h<sup>-1</sup>) (Kim et al. 2020).

68 Analytical quantification and metabolic modelling have advanced knowledge of acetogen  
69 metabolism, allowing for improved process economics and fermentation designs (Marcellin et al.  
70 2016; Heffernan et al. 2022). Transcriptome and translome data have been analysed for *E.*  
71 *limosum* (Song et al. 2017, 2018), and proteomic data for closely related *E. callanderi* (Kim et al.  
72 2021). Some information has been published for the model acetogen, *A. woodii* (Neuendorf et al.  
73 2021), yet no formatotrophic omics datasets exist for *E. limosum* to our knowledge. Since acetogen  
74 metabolism is generally acknowledged to be controlled post-transcription and translation, omics  
75 data, including metabolomics, may be key to revealing growth bottlenecks (Marcellin et al. 2016;  
76 Mahamkali et al. 2020; Heffernan et al. 2022). Moreover, in contrast to batch datasets, steady-state  
77 chemostat cultures offer better reproducibility across experiments, allowing greater insight into  
78 process optimisation (Heffernan et al. 2020).

79 To understand formatotrophic growth and limitations, in this study, we investigated steady-state C<sub>1</sub>  
80 liquid formatotrophic fermentation in chemostat for *E. limosum*. Based on our previous batch  
81 observations showing distinct growth phases when grown on formate and methanol, here we  
82 hypothesised there would be limitations to continuous formate assimilation, perhaps similar to  
83 carbon monoxide toxicity leading to oscillatory growth observed in *Clostridium autoethanogenum*  
84 (Mahamkali et al. 2020). We tested this using differential analysis between formatotrophic and  
85 methylotrophic conditions. Intriguingly the differences are related to both protein expression and  
86 thermodynamics. Whilst growth was poor, unexpectedly, acetate was not the major product.  
87 Furthermore, we observed a biofilm formation, which would negatively impact scalable production.  
88 Anecdotally, adaptive laboratory evolution could be used to address this negative phenotype,

89 particularly given some *E. limosum* strains are known to not form sticky polymers that support  
90 biofilms (Flaiz et al. 2021).

91 We understand there is currently a metabolic model under curation for *E. limosum*, and therefore  
92 differential proteomic and metabolomic data presented here may be a powerful tool to help  
93 facilitate construction of the model (Bae et al. 2021; Fackler et al. 2021).

## 94 Methods/Experimental

### 95 Bacterial Strain, Growth Medium, and Continuous Culture Conditions

96 *Eubacterium limosum* ATCC 8486 (*E. limosum*) was subject to more than 200 generations of Adaptive  
97 Laboratory Evolution under liquid C<sub>1</sub> fermentation conditions (500 mM methanol, 100 mM formate).  
98 A single colony from this cell lineage was used in all experiments and stored as glycerol stocks at -  
99 80°C. This strain was cultivated anaerobically at 37 °C in a chemically defined phosphate buffered  
100 medium with liquid C<sub>1</sub> feedstocks (**Table 1**). The medium contained per litre: 0.5 g MgCl<sub>2</sub>·6H<sub>2</sub>O, 0.5 g  
101 NaCl, 0.13 g CaCl<sub>2</sub>·2H<sub>2</sub>O, 0.75 g NaH<sub>2</sub>PO<sub>4</sub>, 2.05 g Na<sub>2</sub>HPO<sub>4</sub>, 0.25 g KH<sub>2</sub>PO<sub>4</sub>, 0.5 g KCl, 2.5 NH<sub>4</sub>Cl, 0.017 g  
102 FeCl<sub>3</sub>·6H<sub>2</sub>O, 0.5 g L-cysteine hydrochloride monohydrate, 1 mL of 1 g/L resazurin, 10 mL trace metal  
103 solution (TMS), 10 mL B-vitamin solution. The TMS contained per litre: 1.5 g nitrilotriacetic acid, 3 g  
104 MgSO<sub>4</sub>·7H<sub>2</sub>O, 0.5 g MnSO<sub>4</sub>·H<sub>2</sub>O, 1 g NaCl, 0.667 g FeSO<sub>4</sub>·7H<sub>2</sub>O, 0.2 g CoCl<sub>2</sub>·6H<sub>2</sub>O, 0.2 g ZnSO<sub>4</sub>·7H<sub>2</sub>O,  
105 0.02 g CuCl<sub>2</sub>·2H<sub>2</sub>O, 0.014 g Al<sub>2</sub>(SO<sub>4</sub>)<sub>3</sub>·18H<sub>2</sub>O, 0.3 g H<sub>3</sub>BO<sub>3</sub>, 0.03 g Na<sub>2</sub>MoO<sub>4</sub>·2H<sub>2</sub>O, 0.028 g  
106 Na<sub>2</sub>SeO<sub>3</sub>·5H<sub>2</sub>O, 0.02 g NiCl<sub>2</sub>·6H<sub>2</sub>O and 0.02 g Na<sub>2</sub>WO<sub>4</sub>·2H<sub>2</sub>O. The B-vitamin solution contained per  
107 litre: 20 mg biotin, 20 mg folic acid, 10 mg pyridoxine hydrochloride, 50 mg thiamine-HCl, 50 mg  
108 riboflavin, 50 mg nicotinic acid, 50 mg calcium pantothenate, 50 mg vitamin B<sub>12</sub>, 50 mg 4-  
109 aminobenzoic acid and 50 mg thioctic acid. The Rnf complex in *E. limosum* is Na<sup>+</sup> dependant, and  
110 therefore to maintain a consistent concentration across all experiments, NaCl was supplemented to  
111 medium which did not contain sodium formate as a substrate (*i.e.* chemostats growing on  
112 methanol). As a more oxidised substrate is required for methanol growth, gaseous CO<sub>2</sub> was also  
113 provided.

114 Steady-state conditions were reached in 0.5 L Multifors bioreactors (infors AG) controlled by EVE  
115 software at a working volume of 350 mL (magnetic marine impeller agitation). The system was  
116 equipped with peristaltic pumps, mass flow controllers (MFCs), pH and temperature sensors, and  
117 was connected to a Hiden HPR-20-QIC mass spectrometer (Hiden Analytical) for on-line off-gas  
118 analysis. Antifoam (Sigma 435503) was continuously added to the bioreactor using a syringe pump at  
119 10  $\mu\text{L}/\text{h}$ . Results presented here are after optical density, gas uptake/production rates, and  
120 acid/base addition rates were constant for at least five working volumes. Three technical replicate  
121 samples, spaced by one dilution volume, were collected per biological replicate.

## 122 [Experimental analysis and Quantification](#)

### 123 [Extracellular analysis](#)

124 Optical density (OD) measurements were taken at 600 nm via a UV-Vis spectrophotometer (Thermo  
125 Fischer Scientific Genesys 10S UV-Vis Spectrophotometer, USA). A biomass formula of  $\text{C}_4\text{H}_7\text{O}_2\text{N}_{0.6}$   
126 and 0.32 gDCW/L/OD was used to convert OD to molar cell concentrations (Wood et al. 2021). Liquid  
127 samples for extracellular metabolomic analysis were collected, filtered and stored at  $-20\text{ }^\circ\text{C}$ . Samples  
128 were analysed by high performance liquid chromatography using an Agilent 1200 HPLC System with  
129 Phenomenex Rezex RHM-Monosaccharide H+ column (7.8 x 300 mm, PN: OOH-0132-KO) and guard  
130 column (Phenomenex SecurityGuard Carbo-H, PN: AJO-4490). Analytes were eluted isocratically with  
131 4 mM  $\text{H}_2\text{SO}_4$  at  $0.6\text{ mL min}^{-1}$  for 48 min, and column oven temperature of  $65\text{ }^\circ\text{C}$ . 30  $\mu\text{L}$  of sample was  
132 injected and monitored using a UV detector (210 nm) and RID at positive polarity and  $40\text{ }^\circ\text{C}$ .

133 Bioreactor off-gas analysis was performed by an on-line mass spectrometer, monitoring the amounts  
134 of  $\text{H}_2$ , Ar and  $\text{CO}_2$  at 2, 40 and 44 amu respectively. To achieve reliable off-gas analysis, a bypass line  
135 from the feed gas bottle was used as the calibration gas for each MS-cycle (*i.e.* 'on-line' calibration).  
136 Specific rates (mmol/gDCW/d) were calculated by accounting for the exact gas composition,  
137 bioreactor liquid working volume, feed gas flow rate, off-gas flow rate (based on a constant flow of

138 inert Argon), the ideal gas molar volume, pH and CO<sub>2</sub> dissolution equilibrium, and the steady-state  
139 biomass concentration.

140 As a quality check, gaseous samples were also taken for 'off-line' analysis using a Shimadzu 2014 GC,  
141 equipped with a ShinCarbon packed column (ST 80/100, 2mm ID, 1/8 OD Silico, Restek). H<sub>2</sub> and  
142 Argon were detected by a thermal conductivity detector (TCD), while CO<sub>2</sub> was measured using a  
143 flame ionization detector (FID).

#### 144 Intracellular analysis

145 Quantitative proteome analysis was carried out using direct data-independent acquisition mass  
146 spectrometry approach (direct-DIA). Sampling, storage and sample preparation were performed  
147 based on a method previously developed for autotrophic growth of *C. autoethangenum*. Briefly, 5  
148 ODs of culture was pelleted by immediate centrifugation (16,000g for 3 minutes at 4 °C) followed by  
149 washing with 1 mL PBS (Sigma P4417). A further round of centrifugation was used, with the  
150 supernatant then discarded and the remaining sample stored at -20 °C. Approximately 100 µg of  
151 protein was resuspended in 25 µL Milli-Q water and combined with 25 µL SDS lysis buffer (10% SDS,  
152 100 mM Tris). Cells grown on formate required bead beating with a small amount of 0.1 mm  
153 diameter glass beads to lyse. To reduce protein disulphide bonds, dithiothreitol (DTT) was added to a  
154 final concentration of 20 mM before incubating at 70 °C for 1 hour. Iodoacetamide (IAA) was added  
155 to a final concentration of 40 mM and incubated in the dark for 30 minutes to alkylate cysteine. The  
156 reaction was sonicated and 2.5 µL 12% phosphoric acid was added, before combining with 165 µL S-  
157 Trap binding buffer (90% methanol, 100 mM Tris (aq)). The sample was centrifuged for 8 minutes at  
158 13,000 g, before adding to the S-Trap spin column, spun for 1 minute at 4000g and washed thrice  
159 with 150 µL S-Trap binding buffer. 1 µg of trypsin in 50 µL of 50 mM ammonium bicarbonate pH 8  
160 was added to cover the top of the protein trap, incubating in a sealed bag overnight at 37 °C.  
161 Peptides were eluted into a collection tube with 40 µL increasing concentration of acetonitrile in

162 0.1% formic acid. Samples were spun dry and resuspended in 20  $\mu$ L buffer A (0.1% formic acid (aq))  
163 for injection to the mass spectrometer.

164 Mass spectrometry for proteomics analysis was performed using LC-MS/MS with a Thermo Fisher  
165 Scientific UHPLC system coupled to an Exploris 480 mass spectrometer. The electrospray voltage was  
166 2.2 kV in positive-ion mode, and the ion transfer tube temperature was 250 °C. Full MS scans were  
167 acquired in the Orbitrap mass analyser over the range of m/z 340-1110 with a mass resolution of  
168 120,000 (at m/z 200). The automatic gain control (AGC) target value was set at 'Standard', and the  
169 maximum accumulation time was 'Auto' for the MS/MS. The MS/MS ions were measured in 12  
170 windows from mass 350-470, in 36 windows from mass 465-645 and 10 windows from mass 640-  
171 1100. Analysis of data were performed using Spectronaut against a reference proteome (UniProt ID  
172 UP000246246), with a Q-value cutoff of 0.05 applied to differential protein expressions. Locus tags  
173 correspond to (Song et al. 2017, 2018).

174 Intracellular metabolome analysis was based on the method previously developed for autotrophic  
175 growth of *C. autoethangenum* (Mahamkali et al (2020)). Briefly, 5 ODs of culture was pelleted by  
176 immediate centrifugation (16,000g for 3 minutes at 4 °C) followed by resuspension in chilled 50%  
177 acetonitrile to extract intracellular metabolites. Cell debris was removed by centrifugation with the  
178 supernatant stored at -80 °C. Samples were then freeze dried and resuspended in 90  $\mu$ L 2%  
179 acetonitrile containing 5  $\mu$ M azidothymidine standard. To remove lipophilic compounds (such as  
180 lipids, fatty acids, oil), the extract was fractionated by adding 250  $\mu$ L of chloroform, before adding  
181 410  $\mu$ L MQ water, vortexing, and then separating the organic and polar phases by centrifugation.  
182 The polar fraction was cleaned through a spin column, freeze dried and resuspended with 2%  
183 acetonitrile. LC-MS/MS analysis was performed using a Shimadzu UHPLC System (Nexera X2)  
184 coupled to a Shimadzu 8060 triple quadrupole (QqQ) mass spectrometer following (Espinosa et al.  
185 2020; Mahamkali et al. 2020) with modifications and additions to the scheduled multiple reaction  
186 monitoring (sMRM) transitions. Chromatographic separation was performed on a Gemini NX-C18



187 column (3 $\mu$ m x 150mm x 2mm, PN: 00F4453B0, Phenomenex) with an ion-pairing buffer system  
188 consist of mobile phase A: 7.5mM tributylamine (pH 4.95 with acetic acid) and mobile phase B:  
189 acetonitrile. 5  $\mu$ L and 10  $\mu$ L of sample were injected to ensure measured intensities fell within the  
190 standard curve ranges.

191 Cell pellets were also used for PHB content analysis, following the method of (de Souza Pinto  
192 Lemgruber et al. 2019).

### 193 Thermodynamic and kinetic metabolic flux analysis

194 We evaluated reaction thermodynamic driving forces using the thermodynamic variability analysis  
195 model presented by Mahamkali et al. (2020). pH was assumed as 1 unit higher than the extracellular  
196 pH (Lindley et al. 1987). Reaction concentrations were constrained by measured values from  
197 intracellular metabolomics (or the lower limit of quantification, LLOQ). Carboxylate products (*i.e.*,  
198 acetate, butyrate *etc.*) intracellular concentrations were limited according to between *ca.* 1 times  
199 higher, or 10<sup>6</sup> times lower, than extracellularly, depending on possible transport mechanism (Lindley  
200 et al. 1987; Mahamkali et al. 2020). For formate substrate intracellular concentration, this was  
201 instead between 10 times higher, or 50 times lower, than extracellularly (Refer to Dataset A).

202 Beyond that, minimum concentrations were set to be 0.1  $\mu$ M for metabolites, and 1 nM for  
203 dissolved gases unless directly measured or evaluated from Henry's law (H<sub>2</sub>, CO<sub>2</sub> and CO). CO<sub>2</sub> total  
204 concentration, *c*, was calculated from partial pressure, *p*, as,

$$205 \quad c_{CO_2} = p_{CO_2} \times \frac{25.2mM}{atm} \times (1 + 10^{pH-6.116}) \quad (1)$$

206 Maximum values were set to 1 mM for activated metabolites, and 10 mM for others.

207 A high-level estimate for reaction fluxes was determined as follows to estimate potential bottlenecks  
208 in metabolism. Considering metabolic flux (*J*) is controlled by protein concentration (*E*), Gibbs free  
209 energy of reaction ( $\Delta G$ ), saturation by substrates (*M*) with affinity (*K*), kinetic orders ( *$\alpha$* ), and other  
210 sources of regulation (*U*), according to (Heffernan et al. 2022),

211  $J \sim E \times (1 - e^{\Delta G/RT}) \times \prod_i (M_i/K_i)^{a_i} \times U(M)$  (2)

212 The enzyme and kinetics terms can be further simplified using Michaelis-Menten enzyme kinetics for  
213 a given substrate concentration ( $S$ ) to give flux ( $J$ ) as,

214  $J \sim E \times k_{cat} \frac{S}{K_m + S} \times (1 - e^{\Delta G/RT})$  (3)

215 We can then make several assumptions to get likely order of magnitude estimates for  $J$  as follows.

- 216 • Our proteomic analysis can not determine absolute quantifications due to differences in  
217 mass spectrometer protein constituent signal response. However using a spiked protein  
218 analysis, (Valgepea et al. 2022) found a linear relationship between the  $\log_{10}$  of mass  
219 spectrometer intensity and  $\log_{10}$  anchor protein concentrations using a similar instrument  
220 setup to here. Since we can not be certain of the injected sample protein mass, we instead  
221 scaled protein concentrations by the pta enzyme, which Valgepea et al. (2022) showed was  
222 largely consistent across different gas fermentation conditions.
- 223 • Few *E. limosum* proteins have been assayed, and therefore instead we undertook BLAST  
224 analysis of key proteins against enzymes with known kinetic parameters,  $k_{cat}$  and  $K_m$ . We  
225 then used this as verification data against deep learning models, where protein amino acid  
226 sequences were used to yield a complete set of kinetic parameters for the WLP central  
227 carbon metabolism (Kroll et al. 2021; Li et al. 2021). Where intracellular substrate  
228 concentrations,  $S$ , were unknown, instead  $k_{cat}/K_m$  was taken as a proxy for kinetic effects.

## 229 Results

### 230 Steady state fermentation

231 Formatotrophic grown cells reached steady-state at a dilution rate ( $D$ ) of  $0.4 \text{ d}^{-1}$  (specific growth rate  
232 of  $0.017 \text{ h}^{-1}$ ). The dilution rate was chosen as the highest achievable across formatotrophic and  
233 methylotrophic growth conditions, based on batch bottle growth rates. Despite the same amount of

234 carbon being supplied to each condition, formate reached only a biomass concentration of  
235  $0.07 \pm 0.02$  gDCW/L, less than 15% of methylotrophic growth. We note however, that there was  
236 significant biofilm formation in the formate condition, and so biomass concentration as reported  
237 here may be underestimated. As a result, substrate-specific uptake rates were much higher for the  
238 formate condition but potentially overestimated:  $280 \pm 56$  mmol/gDCW/d compared to  $75 \pm 7.0$   
239 mmol/gDCW/d for methanol in the methanol/CO<sub>2</sub> condition (**Figure 1A**).

240 Formatotrophic growth could only be achieved when no CO<sub>2</sub> gas was supplied to the culture.  
241 Further, a formate titre of  $2.0 \pm 0.18$  g/L was observed at steady-state (**Table 1**), indicating the culture  
242 was not formate limited, but rather constrained by another parameter.

243 As expected, formate-grown cells showed significant CO<sub>2</sub> evolution ( $150 \pm 11$  mmol/gDCW/d) (a  
244 formate consumption to CO<sub>2</sub> production ratio of  $1.9 \pm 0.4$  mol/mol). However, unexpectedly, the  
245 major non-CO<sub>2</sub> product under formatotrophic growth was not acetate. Only trace amounts of  
246 acetate were detected throughout the entire fermentation ( $0.92 \pm 0.35$  mmol/gDCW/d) (**Figure 1A**).  
247 Other typical *E. limosum* products such as butyrate ( $0.32 \pm 0.13$  mmol/gDCW/d), hexanoate and  
248 butanol, were minor or below the detection limit (**Figure 1A**).

249 Hydrogen was produced in both cultures as a minor sink of electrons. Intriguingly, despite formate  
250 being the less reduced substrate, it produced more hydrogen at  $21 \pm 7.8$  mmol/gDCW/d compared to  
251  $1.1 \pm 0.56$  mmol/gDCW/d for methanol/CO<sub>2</sub> (**Figure 1A**). We noted in Wood *et al.* (2022) that formate  
252 seems to trigger hydrogen production, which is further reinforced with this data.

253 Overall, this gave a carbon and electron balance of  $63 \pm 15\%$  and  $24 \pm 6\%$  for formatotrophic growth  
254 (**Figure 1B**). These values suggest the production of an unknown product with a redox number of  
255  $5.0 \pm 2.8$ . Given none of the known products which branch from acetyl-CoA were detected (*e.g.*  
256 acetate, butyrate, hexanoate, butanol *etc.*), we hypothesised there may be a product downstream of  
257 pyruvate. Whilst no genes are identified in the *E. limosum* genome for PHB production, given the  
258 unknown product redox number, we analysed cell pellets for intracellular PHB content. Formate

259 cultures showed  $0.68 \pm 0.63\%$  wPHB/wDCW. This is sufficiently low that the effect on carbon and  
260 electron balances is negligible. We also measured for 4-aminobutyrate (GABA) (potentially produced  
261 *via* partial TCA cycle) and 3-methyl-2-oxopentanoate (potentially produced *via* isoleucine  
262 biosynthesis) using HPLC analysis against standards. As neither of them could be found, we also  
263 looked for intermediates along the GABA pathway (2-ketoglutarate), and 3-methyl-2-oxopentanoate  
264 pathway (citrate, 2-oxobutanoate). The analysis confirmed that none of these compounds were  
265 significantly detected in the samples, although the extracellular 2-ketoglutarate concentration was  
266 above the LLOQ for the formatotrophic condition, yet it was not detected for methylotrophic growth  
267 (data not shown).

## 268 Intracellular conditions

269 Given the lack of success in identifying the missing product, we performed proteomics and  
270 metabolomics analyses to gain an understanding of formatotrophic *E. limosum* metabolism, and  
271 compared it to methanol metabolism (Wood et al. 2022). We identified 934 proteins that met the  
272 criteria for differential analysis between the formate and methanol/CO<sub>2</sub> growth conditions (*i.e.*  
273 present in both samples and Q-value < 0.05). Proteome analysis detected all the key enzymes of the  
274 WLP, energy conservation, direct acetyl-CoA condensation pathway, carboxylate/alcohol production,  
275 central carbon metabolism, shikimate pathway, partial TCA cycle, isoleucine biosynthesis, and  
276 biofilm switches (**Figure 2** and **Figure 3**). Across these pathways, 31 intracellular metabolites were  
277 identified in both conditions. Coenzyme A was below the lower limit of quantification (LLOQ) for all  
278 conditions.

279 Formate is assimilated via the formate dehydrogenase elim\_c2470 and FTHFS elim\_c0957 which  
280 have log<sub>2</sub> fold changes of 1.7 and 2.1 and are respectively the 66<sup>th</sup> and 8<sup>th</sup> most 'abundant' proteins.  
281 Given the higher specific flux through the WLP for formate, it is not surprising there is upregulation  
282 generally (elim\_c0959, 1648, 1651, 1655). That said, the log<sub>2</sub> fold changes are mostly small and less  
283 than 2. The WLP proteins which are more regulated in the methanol/CO<sub>2</sub> condition mostly relate to

284 the thermodynamic difficulty in reversing methylene reductase (elim\_c0960-63). Several of the WLP  
285 acs/codh complex were the most abundant in the formatotrophic proteome – elim\_c1655, 1651.  
286 Yet, acetyl-CoA intracellular concentration was one order of magnitude lower ( $0.014 \pm 0.003$   
287  $\mu\text{mol/gDCW}$  compared to  $0.300 \pm 0.133 \mu\text{mol/gDCW}$ ). For reference, *C. autoethanogenum* cells under  
288 syngas growth had an acetyl-CoA concentration of  $0.358 \pm 0.140 \mu\text{mol/gDCW}$  (Mahamkali et al.  
289 2020).

290 Strangely, mtaB (elim\_c3293), part of the methyltransferase operon for methanol assimilation into  
291 the WLP was also one of the most ‘abundant’ proteins in the formatotrophic proteome. Song and  
292 colleagues showed no transcriptome fold change in mtaB between heterotrophic and autotrophic  
293 ( $\text{H}_2/\text{CO}_2$ ) growth, and low relative expression, suggesting that our observation here shows  
294 formatotrophic and methylotrophic growth may share features not seen in other autotrophic  
295 conditions (Song et al. 2018).

296 When it comes to energy conservation, there was little change in etf proteins (elim\_c0229, 0230),  
297 nor Rnf proteins detected (elim\_c3882, 3884, 1224), yet ATPase was strongly downregulated in the  
298 formate condition (elim\_c3452, 3454, 3455, 3670) with  $\log_2$  fold changes greater than 2. ATP/ADP  
299 intracellular ratios were relatively consistent at  $1.4 \pm 0.07$  for the formate condition, and  $1.3 \pm 0.11$  for  
300 methanol/ $\text{CO}_2$ , noting however the ATP/ADP/AMP pool size was one order of magnitude higher in  
301 the latter case. The sporomusa type Nfn complex was upregulated in the formate condition  
302 (elim\_c1993 (Kremp et al. 2020)) with a  $\log_2$  fold change of 2. The NADPH/NADP ratio was  $0.40 \pm 0.25$   
303 and  $1.0 \pm 0.056$  for formate and methanol/ $\text{CO}_2$  respectively, with the same order of magnitude total  
304 pool size. The NADH/NAD ratios were 0.035 and  $0.0011 \pm 0.0006$  respectively, however the total pool  
305 size for methanol/ $\text{CO}_2$  was one order of magnitude higher. The formate condition ratio is similar to a  
306 typical syngas fermentation at NADH/NAD of 0.019 and NADPH/NADP of 0.276 (Mahamkali et al.  
307 2020), which probably reflects formate and syngas operate the WLP and Nfn in the same direction,  
308 unlike methanol.

309 Considering pathways to produce carboxylates from acetyl-CoA (elim\_c0231-0234, 2806, 2339)  
310 there is mostly little change in expression ( $\log_2$  fold change < 1), reinforcing that this metabolism is  
311 regulated post-translation as acetate and butyrate were not major products under formatotrophic  
312 growth. Both acetoacetyl-CoA and 3-hydroxybutyryl-CoA were not detected, supporting the  
313 observation of no butyrate production. *E. limosum* codes for two different pta enzymes, one of  
314 which is significantly upregulated under methylotrophic growth (elim\_c1218;  $\log_2$  fold change 2.4),  
315 and the other significantly upregulated under formatotrophic growth (elim\_c1884;  $\log_2$  fold change  
316 2.7). Despite the upregulation of elim\_c1884, no acetyl-phosphate was detected for the formate  
317 condition, yet  $0.294 \pm 0.177 \mu\text{mol/gDCW}$  was detected under methanol/ $\text{CO}_2$  growth. This probably  
318 reflects the difference in acetyl-CoA/CoA driving force. Whilst cells did not produce alcohols under  
319 any condition, it is interesting to note identification of acetylating aldehyde dehydrogenase  
320 (elim\_c1223), AOR (elim\_c3128, 0919) and alcohol dehydrogenase (elim\_c2439, 2953, 0460). None  
321 of these had  $\log_2$  fold changes greater than 1.5 between the two conditions, yet it is worth noting  
322 elim\_c3128 was in the top 5% of proteome 'abundance'.

323 Carbon flux from the WLP is linked to pyruvate in gluconeogenesis via PFOR (elim\_c2885) or  
324 alternatively Pfl (elim\_c0889), the latter of which is upregulated with a  $\log_2$  fold change of 5.4 for  
325 formatotrophic growth. This is the 9<sup>th</sup> most upregulated formatotrophic gene indicating that cells  
326 may utilise formate directly to synthesise pyruvate, rather than oxidise it to generate ferredoxin and  
327  $\text{CO}_2$  for use by PFOR. Pyruvate was not detected in the methanol/ $\text{CO}_2$  condition (LLOQ 0.0016  
328  $\mu\text{mol/gDCW}$ ), yet it was  $0.060 \pm 0.044 \mu\text{mol/gDCW}$  in formate growth.

329 The remainder of the gluconeogenesis pathway (elim\_c3055, 0452, 3997, 0104, 0106, 0107, 0421, 2869)  
330 all have  $\log_2$  fold changes less than 1.5. Two notable exceptions are TPI (elim\_c0105) and FBA  
331 (elim\_1932, 2267) which are downregulated for formatotrophic growth ( $\log_2$  ca. 2), along with parts  
332 of the pentose phosphate pathway (elim\_c0386, 0631, 1191) ( $\log_2$  fold change ca. 2-3). Of all the  
333 measured intermediates, only FBP was higher under the formate growth condition (yet still below

334 the LLOQ). This seems counterintuitive based on protein expression, unless FBP flux also goes  
335 elsewhere for methylotrophic growth.

336 Branching off the glucogenesis and pentose phosphate pathways, the shikimate pathway proteins all  
337 have  $\log_2$  fold changes less than 1.5, with the sole exception of aroKL (elim\_c0110) being  
338 downregulated in formatotrophic growth with a  $\log_2$  fold change of 1.8. PEP and E4P, which enter  
339 the shikimate pathway, have lower concentrations for the formate condition, compared to  
340 methylotrophic growth ( $0.028 \pm 0.009 \mu\text{mol/gDCW}$  v.  $0.060 \pm 0.018 \mu\text{mol/gDCW}$ , and N.D. v  
341  $0.058 \pm 0.012 \mu\text{mol/gDCW}$ ). Downstream of the shikimate pathway, anthranilate was not detected in  
342 the former condition, and was  $0.002 \pm 0.0004 \mu\text{mol/gDCW}$  in the latter case.

343 The partial TCA cycle, and isoleucine biosynthesis pathways both have three of the most upregulated  
344 proteins under formatotrophic growth (11<sup>th</sup>, 28<sup>th</sup> and 43<sup>rd</sup>). GAD (elim\_c2464) and its antiporter  
345 (elim\_c2465) have  $\log_2$  fold changes of 5.0 and 3.6 respectively, suggesting 4-aminobutyrate (GABA)  
346 may be an extracellular metabolite. Similarly, LeuDH (elim\_c1793) has a  $\log_2$  fold change of 3.9,  
347 suggesting 3-methyl-2-oxopentanoate may also be an extracellular metabolite. ACN (elim\_c1420),  
348 which reversibly converts citrate and isocitrate was upregulated in the formate condition by a  $\log_2$   
349 fold change of 1.7. Yet, intracellular metabolite concentrations were the same in the two conditions  
350 ( $0.127 \pm 0.027 \mu\text{mol/gDCW}$  v.  $0.136 \pm 0.026 \mu\text{mol/gDCW}$ , and  $0.093 \pm 0.017 \mu\text{mol/gDCW}$  v  $0.103 \pm 0.022$   
351  $\mu\text{mol/gDCW}$ ). Interestingly FUM (elim\_c3042, 3043) were both downregulated with a  $\log_2$  fold  
352 change of 1.4 and 2.0 respectively, which seems to correlate with the substrate, malate, having a  
353 higher intracellular concentration for formate ( $0.186 \pm 0.077 \mu\text{mol/gDCW}$ ) compared to  
354 methanol/ $\text{CO}_2$  ( $0.056 \pm 0.018 \mu\text{mol/gDCW}$ ). Isoleucine biosynthesis cimA (elim\_c3964) and leuCD  
355 (elim\_c3962) were downregulated by  $\log_2$  fold changes of 4.3 and 2.6 respectively. The remainder of  
356 the partial TCA cycle and isoleucine biosynthesis pathways showed no significant change in  
357 regulation.

358 We found several significantly ‘abundant’ proteins that have not been annotated. These include, for  
359 example, elim\_c2694 ( $\log_2$  fold change 7.8, 22<sup>nd</sup> most ‘abundant’), yet we note that it had no  
360 significant transcriptome fold changes ( $\log_2 < 1.5$ ) between heterotrophic and autotrophic growth,  
361 indicating it may be specific to C<sub>1</sub> liquid metabolism (Song et al. 2018). Further, there are also  
362 upregulated proteins for which the annotation is ambiguous. For example, elim\_c2880 is the most  
363 upregulated protein with a  $\log_2$  fold change of 10.4, as well as being the 5<sup>th</sup> most ‘abundant’ protein.  
364 It is annotated as a BadM/Rrf2 transcriptional regulator, associated with benzoyl-CoA degradation,  
365 even though benzoate was not present in the medium. We do note BadL, used in PABA metabolism,  
366 is part of this operon although not annotated in *E. limosum* (Vandrisse and Escalante-Semerena  
367 2018). Therefore, this could *potentially* mean there is a PABA nutrient limitation (noting that PABA  
368 was not detected intracellularly in either condition). Similarly, elim\_c1937 is a folate transport  
369 upregulated for formatotrophic growth ( $\log_2$  fold change of 3.8 compared to methylotrophic  
370 growth), indicating a potential THF limitation.

## 371 Discussion

### 372 Metabolic model and redox balances

373 Thus far we have presented ‘omics data for formatotrophic *E. limosum* cultures, with differential  
374 analysis against methylotrophic growth. Whilst valuable conclusions can be drawn, the data takes on  
375 further meaning when integrated together in a complete kinetic model. Since such a model does not  
376 exist for *E. limosum*, we have instead undertaken thermodynamic calculations and various kinetics  
377 assumptions to identify several potential metabolic bottlenecks (refer to materials and methods).

378 Unlike NADH/NAD and NADPH/NADP, we could not measure ferredoxin. However, upper and lower  
379 bounds on the ferredoxin state could be calculated. From the Stn,  $Fd^{2-}/Fd$  must be  $> 0.075$ . Using  
380 Henry’s law, the dissolved hydrogen must be *ca.* 0.6  $\mu$ M and so the hydrogenase suggests  $Fd^{2-}/Fd$   
381 must be  $> 2.4$ . With the Rnf/ATPase complex operating in the forward direction for formate  
382 metabolism (*i.e.*, generating ATP),  $Fd^{2-}/Fd$  should be  $> 1.5$ . For PFOR to generate pyruvate, and



383 assuming a CoA concentration of  $<43 \mu\text{M}$  (LLOQ),  $\text{Fd}^2/\text{Fd}$  must be  $<60$ . However, considering the  
384 predicted kinetic parameters, it is likely that the  $\text{Fd}^2/\text{Fd}$  ratio is on the lower end (*ca.* 4) to generate  
385 sufficient flux through the *methfr*, *codh* and *fdh*. However, given that ferredoxin is mainly used in the  
386 WLP and pyruvate synthesis, this wide range of possible values ( $2.4 < \text{Fd}^2/\text{Fd} < 60$ ) does not provide  
387 further clues as to identification of the unknown product.

388 **Figure 4** illustrates how methanol and formate metabolism differ in the WLP by reversing key  
389 enzymes. The hydrogenase thermodynamic driving force is much larger under formatotrophic  
390 growth, which may explain why we observed higher hydrogen evolution. The methanol condition  
391 has an acetyl-CoA/CoA ratio three orders of magnitude higher than the formate condition, yet we  
392 calculated a similar thermodynamic driving force. This is because, in the latter condition, a much  
393 lower acetate concentration is possible, hence why it is in fact possible for *pta* to reverse under  
394 formatotrophic growth. We calculated this acetate limit to be in the *ca.* 1mM range (using  
395 eQuilibrator (Flamholz et al. 2012) with acetyl-P =  $12.5 \mu\text{M}$ , ATP/ADP = 1.5, pH = 7.9, pMg = 3.0, ionic  
396 strength = 0.25). This confirms, that despite significant upregulation of the *pta* (*elim\_c1884*), acetate  
397 production is limited by post-translation effects. Additionally, we cannot identify how *thl* is feasible  
398 to satisfy butyrate flux, without the acetoacetyl-CoA concentration being below our assumed  
399 minimum value of  $0.1 \mu\text{M}$ , which would surely impose kinetic limitations. Thus, the model confirms  
400 our suspicion that acetyl-CoA must be diverted elsewhere (*i.e.*, towards pyruvate).

401 Interestingly, the upregulated *Pfl* is probably the major source of pyruvate, considering  
402 thermodynamics (**Figure 4**), protein abundance and  $k_{\text{cat}}/K_m$  (**Table 2**). Yet, the model indicates PFOR  
403 may in fact operate in the pyruvate consuming direction during formatotrophic growth, causing a  
404 futile metabolic cycling of pyruvate. Considering thermodynamics, protein 'abundance' and  $k_{\text{cat}}/K_m$   
405 (**Table 2, Figure 4**), these reinforce a mix of pre- and post-translation effects control metabolism and  
406 may explain the lack of production of GABA (no feasible export) and 3-methyl-2-oxopentanoate  
407 (kinetic bottleneck).

408 Given the Stn expression, NADPH likely has greater flux in the formate condition than methanol. This  
409 is interesting because the NADPH/NADP is lower for formate. This could be a clue for product  
410 identification, as production may be tied to the need to regenerate NADP. However, it is noted this  
411 would come at an ATP cost, as ferredoxin is diverted away from Rnf/ATPase chemiosmotic ATP  
412 generation, instead towards Stn to generate NADPH.

### 413 Cellular stress and pyruvate

414 Formate metabolism in acetogens appears partially controlled by protein expression in response to  
415 cellular state. For example, since formatotrophic growth compared to methanol/CO<sub>2</sub> has a much  
416 lower CO<sub>2</sub> driving force, it makes sense that most pyruvate flux would be through heavily  
417 upregulated Pfl, despite PFOR being the normal mechanism for pyruvate synthesis (Neuendorf et al.  
418 2021). Given the low acetyl-CoA/pyruvate ratio, Pfl would require a high formate concentration as  
419 driving force, which may explain why a formate titre existed at steady-state. Previously, researchers  
420 have suggested an increased pyruvate concentration is regulated by PPDK activity and ATP  
421 availability, causing a drop in glucogenic intermediates for *E. limosum* (Lebloas et al. 1996). Similarly,  
422 we found that formatotrophic growth had lower glucogenic intermediates and no change in PPDK  
423 levels (elim\_c3055) compared to methylotrophic growth. Specifically, we can see that the PEP /  
424 pyruvate ratio is respectively 1.3±0.61 and >39±12 (adopting LLOQ for pyruvate where not  
425 detected). This means PPDK activity is being limited by ATP availability, and so increasing pyruvate  
426 concentration and hence the required formate driving force. This associated energy shortage allows  
427 redirection of carbon (Lebloas et al. 1996).

428 We can see this redirection of carbon in the lack of acetate production, and futile upregulation of  
429 the pta enzyme. Given that metabolites on the butyrate production pathway were not detected, this  
430 supports the idea that a significant amount of carbon goes through pyruvate.

431 Of all measured intracellular metabolites, most were relatively similar for both methanol and  
432 formate conditions. However, several which were much lower or below LLOQ for formate only.

433 Some of these are on the glucogenesis pathway, which is controlled by ATP availability discussed  
434 above. We found that pools of NAD, ATP and acetyl-CoA to be one order of magnitude lower for  
435 formatotrophic growth. This is also significantly lower than typical acetogens, despite the  
436 NADH/NAD, ATP/ADP ratios being conserved relative to other conditions (Mahamkali et al. 2020).  
437 Clearly, these ratios are tightly controlled, despite the lower ATP gain from growth, but the overall  
438 pool size is not.

439 It is hard to understand why ATP, NAD and CoA pool sizes are smaller for formatotrophic growth  
440 compared to methylotrophic growth based on the proteomics data given that two proteins involved  
441 in NAD biosynthesis (elim\_c1173, 3031) were upregulated. The remaining two (elim\_c1197, 1880)  
442 were not detected. This includes elim\_c1880, which is used to synthesise NADP from NAD, despite  
443 NADP(H) being detected as a metabolite. In CoA biosynthesis, only one (elim\_c1486) of the four  
444 proteins were identified in the formate condition, compared to three (elim\_c1486, 3523, 2435) in  
445 the methanol condition. The lack of protein detection may correlate with the reduced ability of cells  
446 to synthesise NAD and CoA. GTP is required for AMP synthesis (elim\_c1406, 2669), and since the  
447 GMP flux is not directed to GTP in formatotrophic growth, this may affect the ATP pool size. Some  
448 researchers have found pool size can be reduced by cellular stress conditions, such as pH and  
449 temperature (Chohnan et al. 1998).

#### 450 **Formate itself may be cause of stress**

451 Carboxylate transport in acetogens is possible *via* passive diffusion, symport of anion with a proton,  
452 transport of anion *via* a uniport and ATP-consuming ABC transporter (Mahamkali et al. 2020). Given  
453 we are already energetically limited, we can discount the latter process. An anion uniport (*e.g.*  
454 elim\_c1361 log<sub>2</sub> fold change of 0.7) must balance the charge with independent proton uptake, which  
455 could be *via* an ATPase, thus assisting with the energetic requirements. This would yield a lower  
456 intracellular formate concentration driving force (1 mM; Dataset A), however, our model predicts  
457 the resulting intracellular formate driving force is still sufficient for cell function.

458 Given acid was added throughout the experiment to maintain extracellular pH, there must have  
459 been a net alkalinisation of the cell, which may be the cause of cellular stress. This would lead to a  
460 more negative membrane potential that might be balanced by importing protons through an  
461 ATPase. This could theoretically improve the overall ATP gain. It is important to note *E. limosum*  
462 ATPases are generally thought to be sodium-dependent and we also did not find a significant  
463 upregulation of any ATPase under formatotrophic growth (Song et al. 2017; Kang et al. 2020). Whilst  
464 there was clearly an ATP limitation, the ATP balance itself thus remains unclear.

465 Additionally, formate metabolism is known to lead to a loss of the acetyl-phosphate pool via formyl-  
466 CoA (and hence ATP) (Sly and Stadtman 1963). However, we have not identified the culprit CoA-  
467 hydrolase enzyme in the proteome. Overall, we speculate that cellular stress caused an energy  
468 shortage, increased pyruvate concentration, which then allowed redirection of carbon.

#### 469 **What does AOR do?**

470 We found high ‘abundance’ of AOR, with little difference between the two conditions. Previous  
471 researchers have noted that acetogens are regulated post-translationally (Marcellin et al. 2016;  
472 Mahamkali et al. 2020; Heffernan et al. 2022), and we believe this could be the case for AOR. Whilst  
473 the enzyme is known to be promiscuous, AOR is generally acknowledged not to have C<sub>1</sub> specificity  
474 for formate (Bertsch and Müller 2015). The same can be said for adh. The kinetic deep learning  
475 model, however, suggests formate consumption may be possible (as  $k_{cat}$  and  $K_m$  are similar to C<sub>2</sub> and  
476 C<sub>4</sub> substrates, but adh  $k_{cat}$  is one order of magnitude lower for C<sub>1</sub>; data not shown), but would result  
477 in only *ca.* 0.2  $\mu$ M accumulation of methanol, which is below our limit of detection. In principle, it is  
478 possible, which may explain our previous observation of methanol production from formate during  
479 early growth stages, presumably when there is a highly reduced redox pool (Wood et al. 2021).

#### 480 **CO<sub>2</sub> must be maintained low to allow growth in chemostat**

481 We found cells were unable to grow formatotrophically when 15% CO<sub>2</sub> gas was present in the  
482 headspace. Growth was restored, and steady state was reached when the gas feed contained zero

483 CO<sub>2</sub>. If this requirement was thermodynamics related, the bottleneck reaction would therefore  
484 produce CO<sub>2</sub>. All else being equal, increasing the CO<sub>2</sub> concentration means the formate driving force  
485 must increase, and there must be an upper limit to intracellular formate concentration in terms of  
486 toxicity.

## 487 Biofilm formation

488 Two *E. limosum* cyclic-di-GMP-I riboswitches are known to regulate virulence, motility, quorum  
489 sensing and biofilm (Song et al. 2017). Here, under formatotrophic growth we found upregulation of  
490 two proteins which synthesise cyclic-di-GMP from GMP – elim\_c1151, 3120 (log<sub>2</sub> fold change of 6.2  
491 and 3.1 respectively). Intracellular GMP concentrations were similar for both formatotrophic growth  
492 and methylotrophic growth at 0.008±0.005 μmol/gDCW and 0.007±0.002 μmol/gDCW, respectively.  
493 GMP can also be used for GDP and GTP synthesis and interestingly these proteins (elim\_c1967,  
494 1274) are downregulated for formatotrophic growth (log<sub>2</sub> fold change 1.2 and 2 respectively).  
495 Additionally, unlike the methanol condition, no GDP or GTP were detected under formate growth,  
496 reinforcing that GMP flux went elsewhere. Therefore, we confirm cyclic-di-GMP has a correlation  
497 with biofilm formation strength.

498 We also note GImU (elim\_c1471), which produces a precursor for the adhesion of biofilms in some  
499 bacteria, was upregulated in the formate condition (log<sub>2</sub> fold change of 1.1) (Burton et al. 2006).

500 Interestingly GImU transcriptome shows upregulation in heterotrophic growth, compared to  
501 autotrophic, which matches the past *E. limosum* biofilm formation observations (Song et al. 2018).

502 LuxR (elim\_c1099) is a transcriptional regulator known to affect biofilm formation through quorum  
503 sensing, and here it was upregulated in formatotrophic growth (log<sub>2</sub> fold change of 2.4) (Chen and  
504 Xie 2011). There was little difference in one identified protein related to cell motility (twitching)  
505 (elim\_c0255).

506 From the 'omics data, biofilm formation in *E. limosum* formatotrophic growth is most likely caused  
507 by cyclic-di-GMP production, adhesive compounds and/or quorum sensing. Inhibitors for adhesive

508 compounds produced by GlmU include N-acetyl glucosamine-1-phosphate and iodoacetamide (Chen  
509 et al. 2015). The latter reacts with cysteine in our medium, and so is not an option here.

510 Anthranilate, a tryptophan metabolite, is known to reduce intracellular cyclic-di-GMP, which should  
511 reduce biofilm formation (Li et al. 2017). Other metabolites on the tryptophan pathway, including  
512 indole and D-tryptophan have also been shown to influence biofilm formation. However what works  
513 for one species, can even enhance formation in other species (Li et al. 2017).

514 Interestingly, we did not detect anthranilate in the formate condition, but it was  $0.002 \pm 0.0004$   
515  $\mu\text{mol/gDCW}$  under methylotrophic growth. Anthranilate is produced from S3P, which was three  
516 times higher in the formate condition ( $0.006 \pm 0.003 \mu\text{mol/gDCW}$  versus  $0.002 \pm 0.0003 \mu\text{mol/gDCW}$   
517 for methanol). This trend suggests that there is more flux to anthranilate, but its concentration is  
518 being kept low, perhaps to regulate intracellular cyclic-di-GMP. Hence more biofilm formed in the  
519 formate condition.

520 To investigate this relationship, we supplemented the medium with 0.8 mM anthranilate in a culture  
521 with a pre-formed biofilm. Li and colleagues noted approximately this amount of anthranilate  
522 reduced pre-formed biofilm coverage by up to 30% for three different species of bacteria (Li et al.  
523 2017). However, to our surprise, this concentration of anthranilate had no visual effect on the  
524 formed biofilm (data not shown). It is possible anthranilate may only prevent biofilm formation in *E.*  
525 *limosum*, which we have not tested here. Alternatively, other biofilm inhibitors may need to be tried,  
526 such as N-acetyl glucosamine-1-phosphate to prevent adhesive compound synthesis (Chen et al.  
527 2015).

## 528 Conclusion

529 We have established a baseline formatotrophic steady-state dataset for *E. limosum* covering  
530 phenomics, proteomics and metabolomics. Cells had a high formate-specific uptake rate. However,  
531 unexpectedly they did not produce acetate as a major product. There is evidence of a cellular energy  
532 limitation, which resulted in an accumulation of pyruvate intracellularly, and depletion of the total

533 CoA and NAD pools. Together, these redirected carbon flux away from acetate, despite upregulation  
534 of pta, and towards products downstream of pyruvate. We contend this state of cellular stress  
535 ultimately relates to formate itself as a substrate, which cells attempt to overcome through protein  
536 expression, for example, upregulation of Pfl. This is interesting because acetogen metabolism is  
537 usually controlled post-translation.

538 Despite having high energy efficiency, there are significant challenges to overcome for *E. limosum*  
539 formatotrophy to be a scalable technology. Firstly, limiting biofilm formation, either through  
540 medium supplementation or adaptive laboratory evolution, will be important to reduce operational  
541 costs. Formatotrophy also needs to overcome poor yields and limit excess CO<sub>2</sub> production,  
542 necessitating another substrate such as hydrogen or methanol. Adopting either of those would  
543 partially defeat the purpose of using formate (*i.e.*, liquid feedstock that can be directly synthesised  
544 from CO<sub>2</sub>, fits with existing infrastructure and has no mass transfer limitations). Throughout this  
545 work, we have identified exciting aspects of formate metabolism that could have significance for  
546 acetogen applications, which include more targeted products downstream of pyruvate.

547

## 548 Abbreviations

549 General: Dilution rate; D, Lower Limit of Quantification; LLOQ; Optical Density, OD; Wood-Ljungdahl  
550 Pathway, WLP

551 Compounds: 2PG, 2-phosphoglycerate; 3DHQ, 3-dehydroquininate; 3DHSA, 3-dehydroshikimate; 3PG,  
552 3-phosphoglycerate; Ac-CoA, acetyl-CoA; BPG, 1,3-biphosphoglycerate; DAHP, 3-deoxy-arabino-  
553 heptulonate 7-phosphate; DHAP, Dihydroxy acetone phosphate; E4P, Erythrose 4-phosphate; EPSP,  
554 3-enolpyruvyl-shikimate 5-phosphate; F6P, Fructose 6-phosphate; FBP, Fructose 1,6-biphosphate;  
555 G3P, Glyceraldehyde 3-phosphate; G6P, Glucose 6-phosphate; Glc, Glucose; PEP,  
556 Phosphoenolpyruvate; PRPP, 5-phosphoribosyl diphosphate; PYR, Pyruvate; R5P, Ribose 5-  
557 phosphate; RL5P, Ribulose 5-phosphate; S3P, Shikimate 3-phosphate; S7P, Sedoheptulose 7-  
558 phosphate; THF, tetrahydrofolate; X5P, Xylulose 5-phosphate

559 Enzymes: ALD, aldehyde dehydrogenase; ACK, acetate kinase; ACN, anionitase; ACS, acetyl-CoA  
560 synthase; ADH, alcohol dehydrogenase; AOR, aldehyde:ferredoxin oxidoreductase; aroA, DAHP  
561 synthase; aroA, 3-phosphoshikimate 1-carboxyvinyltransferase; aroB, 3-dehydroquininate synthase;  
562 aroC, chorismate synthase; aroD, 3-dehydroquininate dehydratase; aroKL, shikimate kinase; BK,  
563 butyrate kinase; cimA, citramalate synthase; CODH, CO dehydrogenase; crt, crotonase; CS, citrate  
564 synthase; ENO, enolase; Etf-Bcd, butyryl-CoA dehydrogenase; FBA, Fructose biphosphate aldose;  
565 FBP, fructose 1; FDH, formate dehydrogenase; FTHFS, formyl-THF synthetase; FUM, fumarase; GAD,  
566 glutamate decarboxylase; GAPDH, glyceraldehyde 3-phosphate dehydrogenase; GDH, glutamate  
567 dehydrogenase; GLK, Glucokinase; hbd, 3-hydroxybutyryl-CoA dehydrogenase; IDH, isocitrate  
568 dehydrogenase; ilvBN, pyruvate:2-oxobutanoate acetaldehydetransferase; ilvC, 2-aceto-2hydroxy-  
569 butanoate:NADP+ oxidoreductase; ilvD, dihydroxy acid dehydratase; ilvE, branched chain amino acid  
570 aminotransferase; KOR, oxoglutarate ferredoxin oxidoreductase; leuB, methylmalate  
571 dehydrogenase; leuCD, methylmalate hydrolase; LeuDh, leucine dehydrogenase; MDH, malate  
572 dehydrogenase; MtaABC, methanol dependent methyl transferase; MTHFC, methenyl-THF



573 cylcohydrolase; MTHFD, methylene-THF dehydrogenase; MTHFR, methyltransferase / methylene-  
574 THF reductase; PC, pyruvate carboxylase; PD, pyruvate dehydrogenase; PFKA, Phosphofructose  
575 kinase; PFL, pyruvate formate ligase; PFOR, pyruvate ferredoxin oxidoreductase; PGAM,  
576 phosphoglycerate mutase; PGI, Glucose 6-phosphate isomerase; PGK, phosphoglycerate kinase; PK,  
577 pyruvate kinase; PPK, phosphoenolpyruvate synthetase; PRPS, Ribose phosphat  
578 epyrophosphokinase; PTA, phosphotransacetylase; PTB, phosphotransbutyrylase; PTS,  
579 phosphotransferase system; RPE, Ribulose phosphate epimerase; RPI, Ribose phosphate isomerase;  
580 Stn, Sporomusa type Nfn transhydrogenase; TAL, Transaldolase; thl, thiolase; TKT, Transketolase;  
581 TPI, Triseposphate isomerase; trpE, anthranilate synthase; ydiB, shikimate dehydrogenase

## 582 Availability of data and materials

583 The datasets used and/or analysed during the current study are available from the corresponding  
584 author on reasonable request.

## 585 Competing interests

586 The authors declare that they have no competing interests

## 587 Funding

588 JW acknowledges support of the Warwick and Nancy Olsen Scholarship. BV acknowledges the  
589 support of the Australian Research Council (ARC) through grant FL170100086 and LP200200136. EM  
590 acknowledges the support of the ARC CoE in Synthetic Biology CE200100029 and LP200200136. The  
591 research utilised equipment and support provided by the BPA-funded facility, Queensland  
592 Metabolomics And Proteomics (Q-MAP), an Australian Government initiative being conducted as  
593 part of the National Collaborative Research Infrastructure Strategy (NCRIS) National Research  
594 Infrastructure for Australia .

## 595 Authors' contributions

596 JCW designed and conducted experiments, interpreted results and was a major contributor in  
597 writing the manuscript. RAGG jointly conducted experiments. DD performed intracellular  
598 metabolomics analysis. GT performed proteomics analysis. MRP performed extracellular  
599 metabolomics and PHB analysis. EM and BV conceived experiments and provided substantive  
600 manuscript review. All authors read and approved the final manuscript.

## 601 Acknowledgements

602 Not applicable

## 603 References

- 604 Al-Breiki M, Bicer Y (2020) Comparative cost assessment of sustainable energy carriers produced  
605 from natural gas accounting for boil-off gas and social cost of carbon. *Energy Reports* 6:1897–  
606 1909. <https://doi.org/10.1016/j.egy.2020.07.013>
- 607 Bae J, Song Y, Lee H, Cho B (2021) Reconstruction of a genome-scale model of *Eubacterium limosum*  
608 converting C1 substrates to multi-carbon products
- 609 Bertsch J, Müller V (2015) Bioenergetic constraints for conversion of syngas to biofuels in acetogenic  
610 bacteria. *Biotechnol. Biofuels* 8
- 611 Burton E, Gawande P V., Yakandawala N, et al (2006) Antibiofilm activity of GImU enzyme inhibitors  
612 against catheter-associated uropathogens. *Antimicrob Agents Chemother* 50:1835–1840.  
613 <https://doi.org/10.1128/AAC.50.5.1835-1840.2006>
- 614 Buttlare DH (1980) Purification and properties of Formyltetrahydrofolate Synthetase. *Methods in*  
615 *Enzymol* 66:585–599
- 616 Chen J, Xie J (2011) Role and regulation of bacterial LuxR-like regulators. *J Cell Biochem* 112:2694–  
617 2702. <https://doi.org/10.1002/jcb.23219>
- 618 Chen S, He N, Yu J, et al (2015) Inhibitory effect of 2-mercaptoethane sulfonate on the formation of  
619 *Escherichia coli* biofilms in vitro. *Mol Med Rep* 12:5223–5230.  
620 <https://doi.org/10.3892/mmr.2015.4112>
- 621 Chohnan S, Izawa H, Nishihara H, Takamura Y (1998) Changes in Size of Intracellular Pools of  
622 Coenzyme A and Its Thioesters in *Escherichia coli* K-12 Cells to Various Carbon Sources and  
623 Stresses. *Biosci Biotechnol Biochem* 62:1122–1128
- 624 Chou A, Lee SH, Zhu F, et al (2021) An orthogonal metabolic framework for one-carbon utilization.  
625 *Nat Metab* 3:1385–1399. <https://doi.org/10.1038/s42255-021-00453-0>
- 626 Clark J, Ljungdahl LG (1982) Purification and properties of 5,10-methenyltetrahydrofolate  
627 cyclohydrolase from *Clostridium formicoaceticum*. *J Biol Chem* 257:3833–3836.  
628 [https://doi.org/10.1016/s0021-9258\(18\)34857-9](https://doi.org/10.1016/s0021-9258(18)34857-9)
- 629 Cotton CA, Claassens NJ, Benito-Vaquerizo S, Bar-Even A (2020) Renewable methanol and formate as  
630 microbial feedstocks. *Curr Opin Biotechnol* 62:168–180.  
631 <https://doi.org/10.1016/j.copbio.2019.10.002>
- 632 Davies JA (2017) Characterisation of the reversible formate dehydrogenases of *Shewanella*.  
633 University of East Anglia
- 634 de Souza Pinto Lemgruber R, Valgepea K, Tappel R, et al (2019) Systems-level engineering and  
635 characterisation of *Clostridium autoethanogenum* through heterologous production of poly-3-  
636 hydroxybutyrate (PHB). *Metab Eng* 53:14–23. <https://doi.org/10.1016/j.ymben.2019.01.003>
- 637 Espinosa MI, Gonzalez-Garcia RA, Valgepea K, et al (2020) Adaptive laboratory evolution of native  
638 methanol assimilation in *Saccharomyces cerevisiae*. *Nat Commun* 11:5564.  
639 <https://doi.org/10.1038/s41467-020-19390-9>
- 640 Fackler N, Heijstra BD, Rasor BJ, et al (2021) Annual Review of Chemical and Biomolecular  
641 Engineering. *Annu Rev Chem Biomol Eng*. <https://doi.org/https://doi.org/10.1146/annurev-chembioeng-120120-021122>
- 642
- 643 Flaiz M, Ludwig G, Bengelsdorf FR, Durre P (2021) Production of the Biocommodities Butanol and

- 644 Acetone from Methanol with Fluorescent FAST-tagged Proteins using Metabolically Engineered  
645 Strains of *Eubacterium limosum*. *Biotechnol Biofuels* 14:117:  
646 <https://doi.org/https://doi.org/10.21203/rs.3.rs-171102/v1>
- 647 Flamholz A, Noor E, Bar-Even A, Milo R (2012) EQUilibrator - The biochemical thermodynamics  
648 calculator. *Nucleic Acids Res* 40:770–775. <https://doi.org/10.1093/nar/gkr874>
- 649 Heffernan JK, Mahamkali V, Valgepea K, et al (2022) Analytical tools for unravelling the metabolism  
650 of gas-fermenting Clostridia. *Curr Opin Biotechnol* 75:102700:  
651 <https://doi.org/10.1016/j.copbio.2022.102700>
- 652 Heffernan JK, Valgepea K, Souza R De, et al (2020) Enhancing CO<sub>2</sub>-valorization using *Clostridium*  
653 *autoethanogenum* for sustainable fuel and chemicals production. *Front Bioeng Biotechnol*  
654 8:204. <https://doi.org/https://doi.org/10.3389/fbioe.2020.00204>
- 655 Kang S, Song Y, Jin S, et al (2020) Adaptive Laboratory Evolution of *Eubacterium limosum* ATCC 8486  
656 on Carbon Monoxide. *Front Microbiol* 11:. <https://doi.org/10.3389/fmicb.2020.00402>
- 657 Kim J, Park S, Jeong J, et al (2021) Bioresource Technology Methanol supply speeds up synthesis gas  
658 fermentation by methylotrophic-acetogenic bacterium, *Eubacterium limosum* KIST612.  
659 *Bioresour Technol* 321:124521. <https://doi.org/10.1016/j.biortech.2020.124521>
- 660 Kim S, Lindner SN, Aslan S, et al (2020) Growth of *E. coli* on formate and methanol via the reductive  
661 glycine pathway. *Nat Chem Biol* 16:538–545. <https://doi.org/10.1038/s41589-020-0473-5>
- 662 Köpke M, Simpson SD (2020) Pollution to products: recycling of ‘above ground’ carbon by gas  
663 fermentation. *Curr Opin Biotechnol* 65:180–189. <https://doi.org/10.1016/j.copbio.2020.02.017>
- 664 Kremp F, Roth J, Müller V (2020) The *Sporomusa* type Nfn is a novel type of electron-bifurcating  
665 transhydrogenase that links the redox pools in acetogenic bacteria. *Sci Rep* 10:1–14.  
666 <https://doi.org/10.1038/s41598-020-71038-2>
- 667 Kroll A, Engqvist MKM, Heckmann D, Lercher MJ (2021) Deep learning allows genome-scale  
668 prediction of Michaelis constants from structural features. *PLoS Biol* 19:1–21.  
669 <https://doi.org/10.1371/journal.pbio.3001402>
- 670 Lebloas P, Lindley ND, Loubiere P (1996) Regulation of carbon and energy metabolism during the  
671 linear growth phase in batch fermentations of the acetogenic methylotroph *Eubacterium*  
672 *limosum* on methanol/CO<sub>2</sub>. *Enzyme Microb Technol* 19:187–195.  
673 [https://doi.org/10.1016/0141-0229\(95\)00230-8](https://doi.org/10.1016/0141-0229(95)00230-8)
- 674 Li F, Yuan L, Lu H, et al (2021) Deep learning based kcat prediction enables improved enzyme  
675 constrained model reconstruction. *bioRxiv*. <https://doi.org/10.1101/2021.08.06.455417>
- 676 Li XH, Kim SK, Lee JH (2017) Anti-biofilm effects of anthranilate on a broad range of bacteria. *Sci Rep*  
677 7:1–12. <https://doi.org/10.1038/s41598-017-06540-1>
- 678 Lindley ND, Loubiere P, Pacaud S, et al (1987) Novel Products of the Acidogenic Fermentation of  
679 Methanol during Growth of *Eubacterium limosum* in the Presence of High Concentrations of  
680 Organic Acids. *Microbiology* 133:3557–3563. <https://doi.org/10.1099/00221287-133-12-3557>
- 681 Ljungdahl LG (2009) A Life with Acetogens, Thermophiles, and Cellulolytic Anaerobes. *Annu Rev*  
682 *Microbiol* 63:1–25. <https://doi.org/10.1146/annurev.micro.091208.073617>
- 683 Mahamkali V, Valgepea K, de Souza Pinto Lemgruber R, et al (2020) Redox controls metabolic  
684 robustness in the gas-fermenting acetogen *Clostridium autoethanogenum*. *Proc Natl Acad Sci*  
685 117:13168–13175. <https://doi.org/10.1073/pnas.1919531117>

- 686 Marcellin E, Behrendorff JB, Nagaraju S, et al (2016) Low carbon fuels and commodity chemicals  
687 from waste gases-systematic approach to understand energy metabolism in a model acetogen.  
688 *Green Chem* 18:3020–3028. <https://doi.org/10.1039/c5gc02708j>
- 689 Neuendorf CS, Vignolle GA, Derntl C, et al (2021) A quantitative metabolic analysis reveals  
690 *Acetobacterium woodii* as a flexible and robust host for formate-based bioproduction. *Metab*  
691 *Eng*. <https://doi.org/10.1016/j.ymben.2021.09.004>
- 692 Rabiee H, Ge L, Zhang X, et al (2021) Gas diffusion electrodes (GDEs) for electrochemical reduction of  
693 carbon dioxide, carbon monoxide, and dinitrogen to value-added products: a review. *Energy*  
694 *Environ Sci* 1959–2008. <https://doi.org/10.1039/d0ee03756g>
- 695 Ragsdale SW, Ljungdahl LG (1984) Purification and properties of NAD-dependent 5,10-  
696 methylenetetrahydrofolate dehydrogenase from *Acetobacterium woodii*. *J Biol Chem*  
697 259:3493503. [https://doi.org/10.1016/s0021-9258\(17\)43122-x](https://doi.org/10.1016/s0021-9258(17)43122-x)
- 698 Robb FT, Park JB, Adams MWW (1992) Characterization of an extremely thermostable glutamate  
699 dehydrogenase: a key enzyme in the primary metabolism of the hyperthermophilic  
700 archaeobacterium, *Pyrococcus furiosus*. *Biochim Biophys Acta (BBA)/Protein Struct Mol*  
701 1120:267–272. [https://doi.org/10.1016/0167-4838\(92\)90247-B](https://doi.org/10.1016/0167-4838(92)90247-B)
- 702 Sly WS, Stadtman ER (1963) Formate Metabolism. *J Biol Chem* 238:2632–2638.  
703 [https://doi.org/10.1016/s0021-9258\(18\)67878-0](https://doi.org/10.1016/s0021-9258(18)67878-0)
- 704 Song Y, Shin J, Jeong Y, et al (2017) Determination of the Genome and Primary Transcriptome of  
705 Syngas Fermenting *Eubacterium limosum* ATCC. *Sci Rep* 7:1–11.  
706 <https://doi.org/10.1038/s41598-017-14123-3>
- 707 Song Y, Shin J, Jin S, et al (2018) Genome-scale analysis of syngas fermenting acetogenic bacteria  
708 reveals the translational regulation for its autotrophic growth. *BMC Genomics* 19:837.  
709 <https://doi.org/10.1186/s12864-018-5238-0>
- 710 Spurgeon JM, Kumar B (2018) A comparative technoeconomic analysis of pathways for commercial  
711 electrochemical CO<sub>2</sub> reduction to liquid products. *Energy Environ Sci* 11:1536–1551.  
712 <https://doi.org/10.1039/C8EE00097B>
- 713 Valgepea K, Talbo G, Takemori N, et al (2022) Absolute Proteome Quantification in the Gas-  
714 Fermenting Acetogen *Clostridium autoethanogenum*. *mSystems* 7:1–19.  
715 <https://doi.org/10.1128/msystems.00026-22>
- 716 Vandrisse CM, Escalante-Semerena JC (2018) Small-Molecule Acetylation Controls the Degradation  
717 of Benzoate and Photosynthesis in *Rhodospseudomonas palustris*. *MBio* 9:1–17.  
718 <https://doi.org/https://doi.org/10.1128/mBio.01895-18>
- 719 Wang VCC, Ragsdale SW, Armstrong FA (2013) Investigations of two bidirectional carbon monoxide  
720 dehydrogenases from *carboxydotherrmus hydrogenoformans* by protein film electrochemistry.  
721 *ChemBioChem* 14:1845–1851. <https://doi.org/10.1002/cbic.201300270>
- 722 Warwick N, Griffiths P, Keeble J, et al (2022) Atmospheric implications of increased Hydrogen use.  
723 United Kingdom Department for Business, Energy & Industrial Strategy
- 724 Wood JC, Gonzalez-garcia RA, Daygon D, et al (2022) Molecular understanding of *Eubacterium*  
725 *limosum* chemostat methanol metabolism. *bioRxiv*.  
726 <https://doi.org/https://doi.org/10.1101/2022.11.04.514945>
- 727 Wood JC, Marcellin E, Plan MR, Viridis B (2021) High methanol-to-formate ratios induce butanol  
728 production in *Eubacterium limosum*. *Microb Biotechnol*. <https://doi.org/10.1111/1751->

729 7915.13963

730 Wood JC, Yuan Z, Viridis B (In press) Towards carbon neutral chemicals production: opportunities for  
731 combining fermentation with electrochemical processes. Curr Opin Electrochem COELEC-D-22-  
732 00174R2

733

734

## 735 Tables

736 *Table 1 Summary of Eubacterium limosum fermentations. N = stirrer speed; BR = biological replicates; BC = biomass*  
 737 *concentration. Methylophilic data in the first row is provided for comparison from (Wood et al. 2022).*

| Condition      | Gas                         | N   | BR | D                 | pH       | BC        | Acetate     | Butyrate    |
|----------------|-----------------------------|-----|----|-------------------|----------|-----------|-------------|-------------|
|                |                             | rpm | #  | Day <sup>-1</sup> | Setpoint | gDCW/L    | g/L         | g/L         |
| 100mM Methanol | 85% Ar, 15% CO <sub>2</sub> | 400 | 2  | 0.4               | 6.8      | 0.54±0.05 | 1.60±0.08   | 0.99±0.05   |
| 100 mM Formate | 100% Ar                     | 400 | 2  | 0.4               | 6.8      | 0.07±0.02 | 0.014±0.006 | 0.006±0.001 |

738

739 *Table 2 Kinetic parameters of enzymes with highest, to our knowledge, BLAST similarity to E. limosum enzymes. Deep*  
 740 *learning models have been used as a comparison, and for all remaining pathways.*

| Enzyme | Substrate       | Cofactor                           | K <sub>M</sub> (μM)     | V <sub>max</sub> (U/mg) | Assay k <sub>cat</sub> /K <sub>M</sub> (M <sup>-1</sup> s <sup>-1</sup> ) | BLAST similarity                                                                                                                                               | Deep learning prediction k <sub>cat</sub> /K <sub>M</sub> (M <sup>-1</sup> s <sup>-1</sup> ) |
|--------|-----------------|------------------------------------|-------------------------|-------------------------|---------------------------------------------------------------------------|----------------------------------------------------------------------------------------------------------------------------------------------------------------|----------------------------------------------------------------------------------------------|
| metFV  | methyl-THF      |                                    |                         |                         |                                                                           |                                                                                                                                                                | 4.96E+06                                                                                     |
| MTHFD  | methylene-THF   | NADH                               | 2000                    | 1650                    | 4.46E+05                                                                  | <i>A woodii</i> (86% to elim_c0959)(Ragsdale and Ljungdahl 1984)                                                                                               | 8.91E+04                                                                                     |
| MTHFC  | methenyl-THF    | NADH                               |                         |                         |                                                                           | <i>C formicaceticum</i> (60% to elim_c0958)(Clark and Ljungdahl 1982)                                                                                          | 1.33E+05                                                                                     |
| FTHFS  | formyl-THF      | ATP                                | 6700                    | 58.75                   | 3.51E+04                                                                  | <i>Clostridium cylindrosporum</i> (To elim_c0957)(Buttlaire 1980)                                                                                              | 1.32E+03                                                                                     |
| Fdh    | Formate         | MV                                 | 39                      | 0.74                    | 3.34E+04                                                                  | <i>Shewanella oneidensis</i> (44% to elim_c2470)(Davies 2017)                                                                                                  | 1.65E+04                                                                                     |
| codh   | CO <sub>2</sub> | Electrode                          | 8100 (Wang et al. 2013) |                         | 4.81E+03                                                                  | <i>Carboxydotherrus hydrogenoformas</i> (42% to elim_c1653) (Wang et al. 2013)<br><i>Clostridium autoethanogenum</i> (55% to elim_c1653)(Valgepea et al. 2022) | 8.23E+04                                                                                     |
| PFOR   | Acetyl-CoA      | Fd <sup>2+</sup> , CO <sub>2</sub> |                         |                         |                                                                           | elim_c2885                                                                                                                                                     | 1.47E+05                                                                                     |
| Pfl    | Acetyl-CoA      | Formate                            |                         |                         |                                                                           | elim_c0889                                                                                                                                                     | 2.63E+05                                                                                     |
| PC     | pyruvate        | ATP                                |                         |                         |                                                                           | elim_c0058                                                                                                                                                     | 2.89E+04                                                                                     |
| CS     | Acetyl-CoA      |                                    |                         |                         |                                                                           | elim_c3511                                                                                                                                                     | 2.20E+05                                                                                     |
| ACN    | Citrate         |                                    |                         |                         |                                                                           | elim_c1420                                                                                                                                                     | 2.88E+03                                                                                     |
| IDH    | Isocitrate      | NAD                                |                         |                         |                                                                           | elim_c2883                                                                                                                                                     | 2.24E+04                                                                                     |
| GDH    | 2-oxoglutarate  | NAD(P)H                            | 4000                    | 32.5                    | 3.66E+04                                                                  | <i>P. furiosus</i> (49% to elim_c2504)(Robb et al. 1992)                                                                                                       | 9.88E+04                                                                                     |
| GAD    | Glutamate       |                                    |                         |                         |                                                                           | elim_c2464                                                                                                                                                     | 9.85E+03                                                                                     |
| cimA   | Acetyl-CoA      | Pyruvate                           |                         |                         |                                                                           | elim_c3964                                                                                                                                                     | 8.26E+05                                                                                     |
| leuCD  | Citramalate     |                                    |                         |                         |                                                                           | elim_c3963                                                                                                                                                     | 1.34E+05                                                                                     |

|       |                                  |           |  |  |                           |          |
|-------|----------------------------------|-----------|--|--|---------------------------|----------|
| leuCD | Citraconate                      |           |  |  | elim_c3962                | 1.01E+07 |
| leuB  | D-erythro-3-methylmalate         | NAD       |  |  | elim_c3961                | 1.61E+05 |
| ilvBN | 2-oxobutanoate                   | Pyruvate  |  |  | elim_c3959/<br>elim_c1989 | 7.06E+02 |
| ilvC  | 2-aceto-2-hydroxybutanoate       | NAD(P)H   |  |  | elim_c3965                | 5.22E+02 |
| ilvD  | 2,3-dihydroxy-3-methylpentanoate |           |  |  | elim_c3960                | 3.24E+03 |
| ilvE  | 3-methyl-2-oxopentanoate         | Glutamate |  |  | elim_c0806                | 2.97E+03 |
| LeuDH | isoleucine                       | NAD       |  |  | elim_c1793                | 7.26E+02 |

741

## 742 Figures

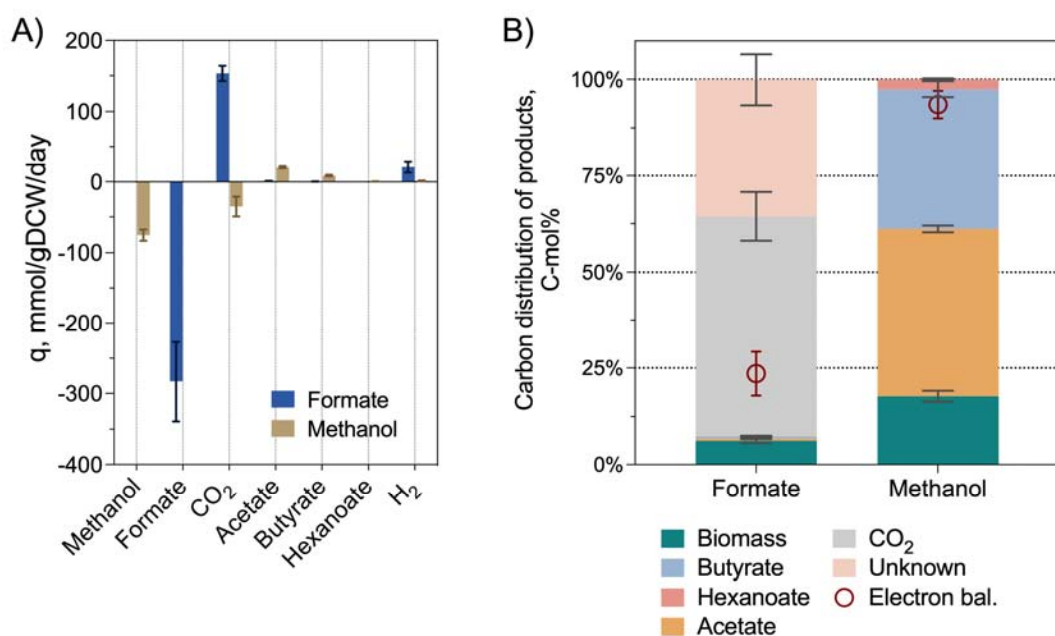

743

744 *Figure 1 Characteristics of Eubacterium limosum in autotrophic chemostats, with conditions as summarised in Table 1.*

745 *Methylotrophic data is provided for comparison from (Wood et al. 2022). (A) specific uptake and production rates. (B)*

746 *carbon distribution of products. Values represent the average  $\pm$  standard deviation between biological replicate triplicates.*

747



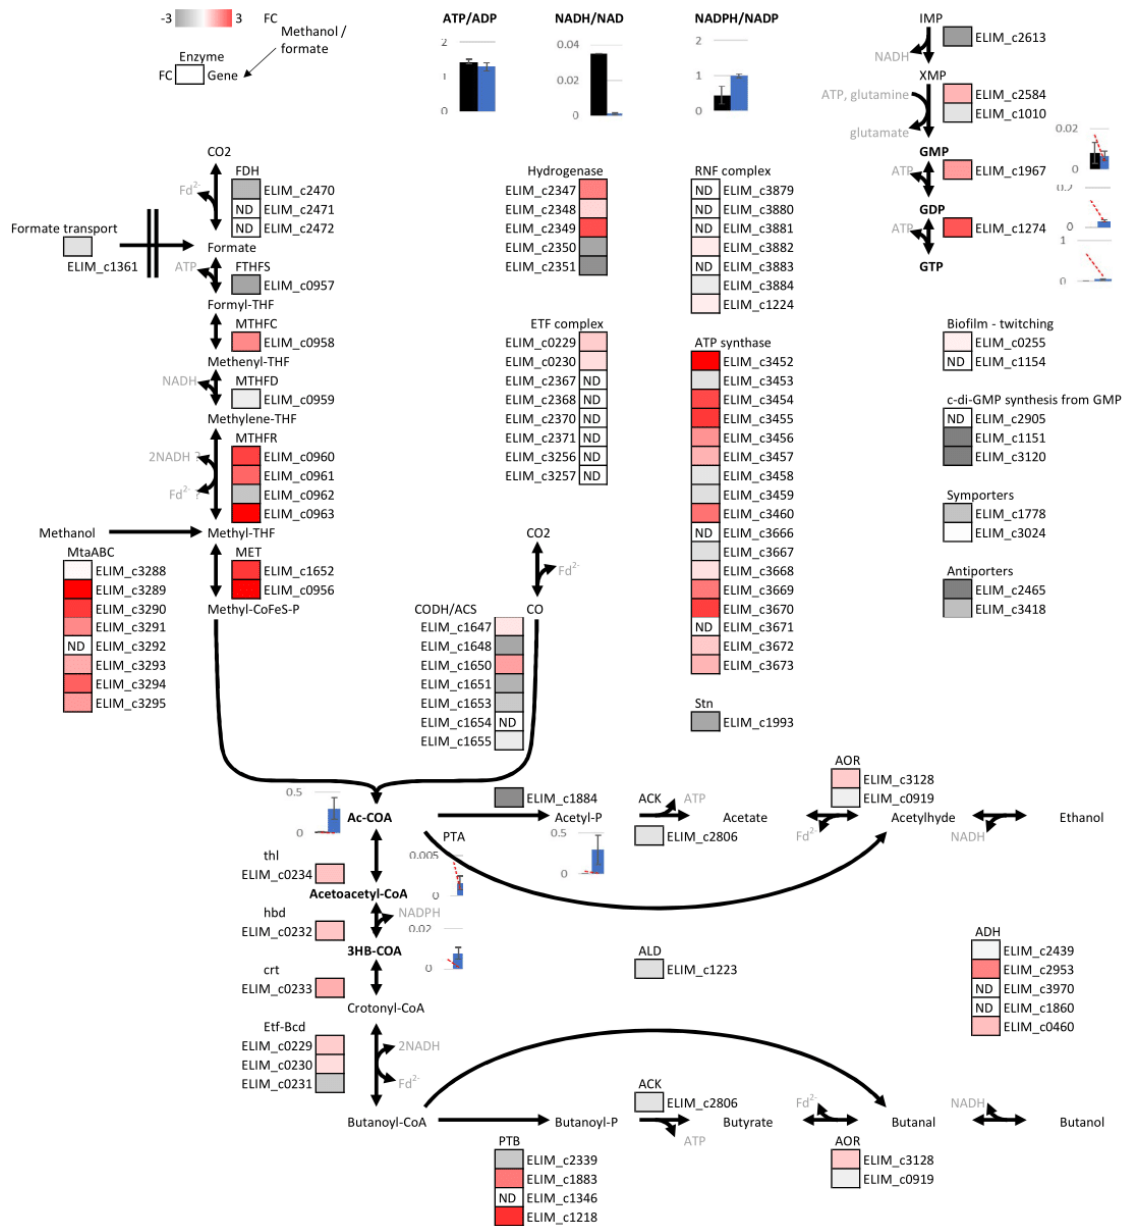

748

749 *Figure 2 Schematic representation of Wood Ljungdahl Pathway metabolism in E. limosum during C<sub>1</sub> fermentation. Reactions*  
 750 *are shown with substrates, products and redox mediators, however without stoichiometric balances along pathways.*  
 751 *Enzymes and associated protein accession numbers (elim\_cxxxx) are shown for each reaction, along with log<sub>2</sub> fold changes*  
 752 *comparing methylotrophic (Wood et al. 2022) and formatotrophic growth. Intracellular metabolites concentrations*  
 753 *(µmol/gDCW) are shown for select metabolites as the average ± standard deviation of biological replicate triplicates. The*  
 754 *methanol condition is in blue, and formate condition in black. The lower limit of quantification is shown as a red dashed*  
 755 *line, which differs between the conditions due to the differences in cell pellet mass.*

756

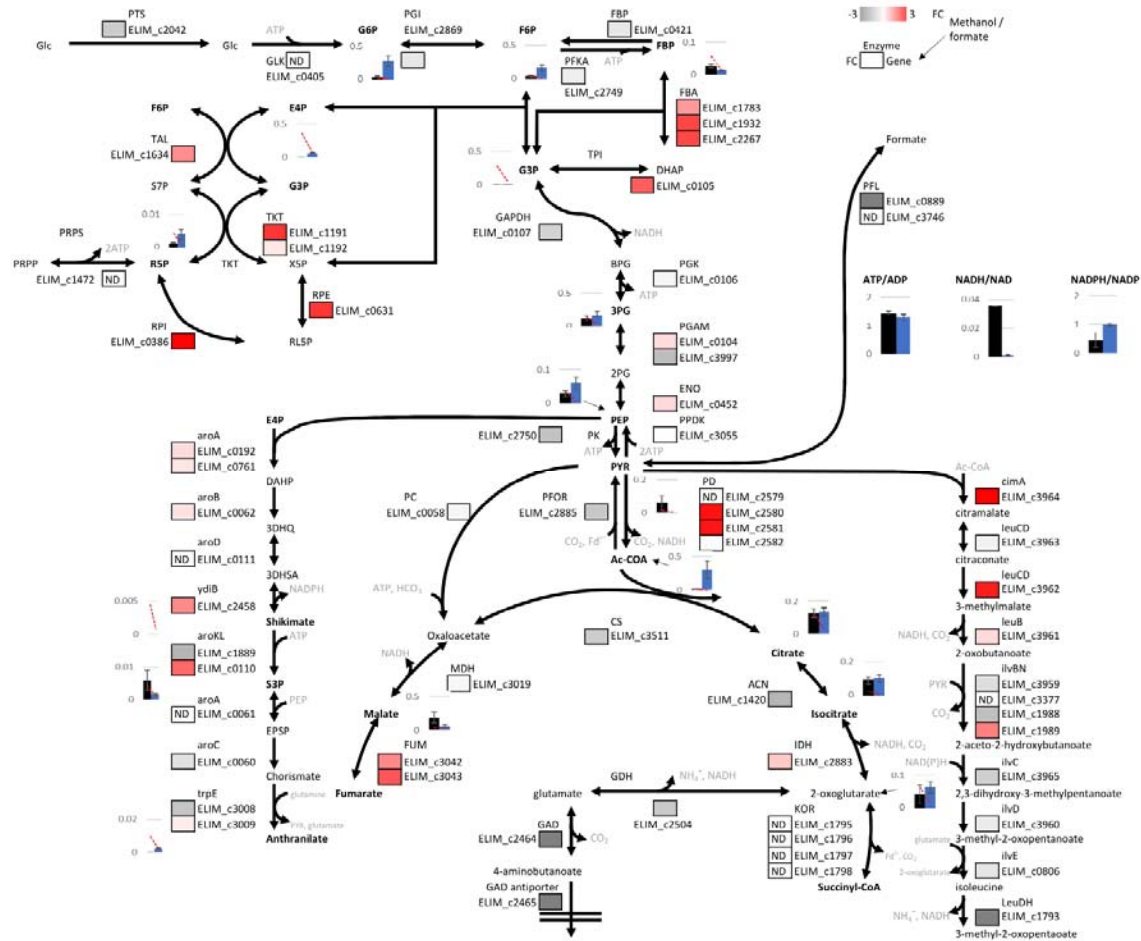

757

758 *Figure 3 Schematic representation of central carbon metabolism in E. limosum during C<sub>1</sub> fermentation.*  
 759 *Reactions are shown with substrates, products and redox mediators, however without stoichiometric balances along*  
 760 *pathways. Enzymes and associated protein accession numbers (elim\_cxxxx) are shown for each reaction, along with log<sub>2</sub>*  
 761 *fold changes comparing methylotrophic (Wood et al. 2022) and formatotrophic growth. Intracellular metabolites*  
 762 *concentrations (μmol/gDCW) are shown for select metabolites as the average ± standard deviation of biological replicate*  
 763 *triplicates. The methanol condition is in blue, and formate condition in black. The lower limit of quantification is shown as a*  
 764 *red dashed line, which differs between the conditions due to the differences in cell pellet mass.*

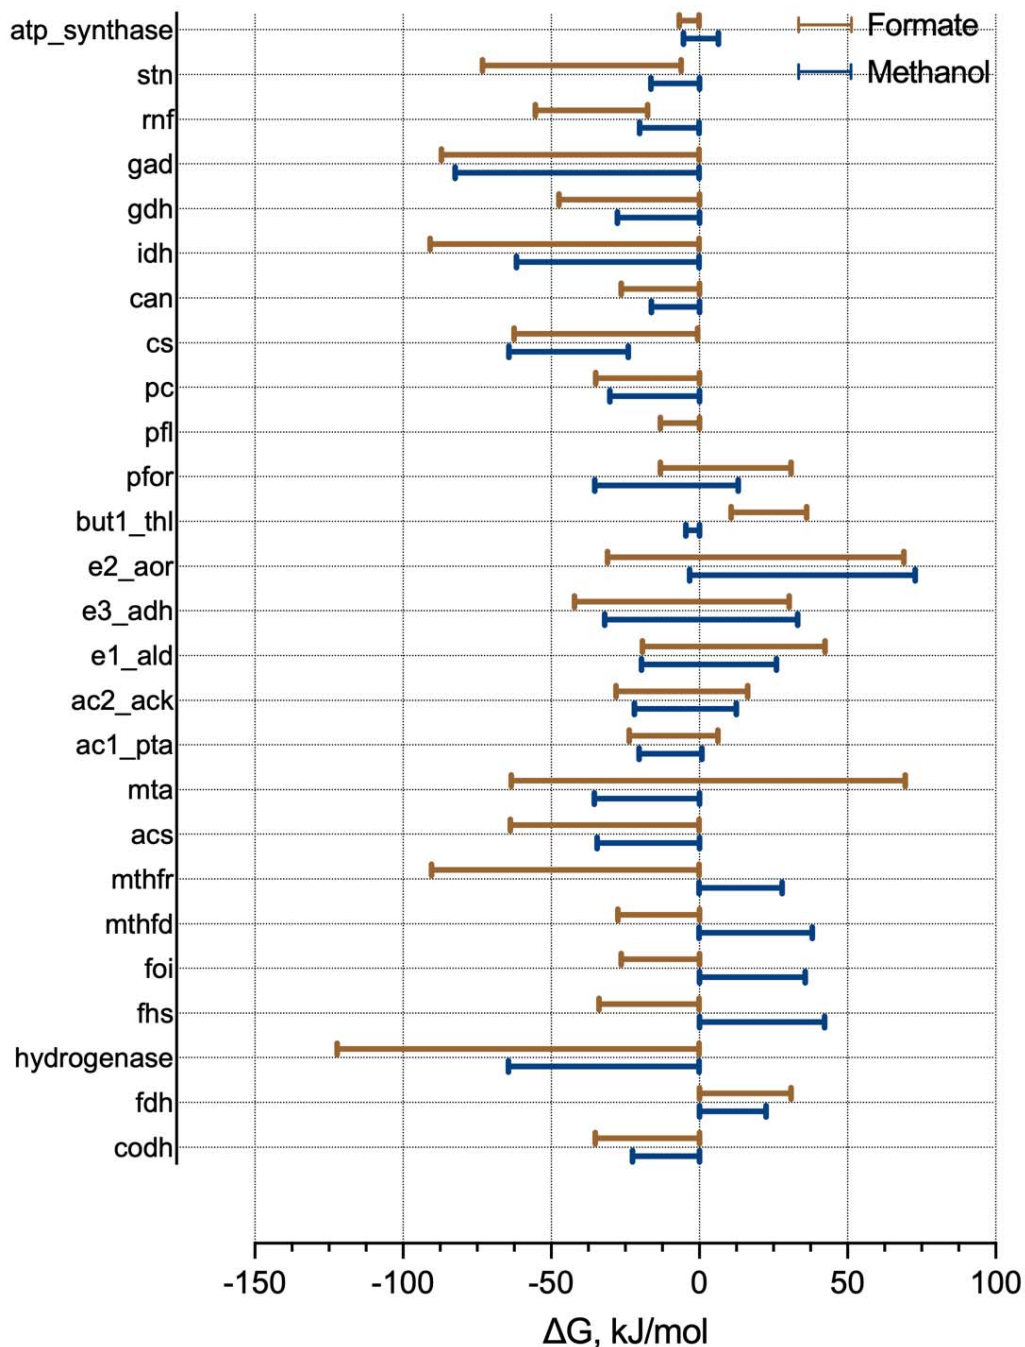

765

766 Figure 4 tMFA of *E. limosum* showing maximum allowable range of Gibbs free energy for respective reactions of the  
767 methanol/ $\text{CO}_2$  (blue) and formate (brown) conditions using thermodynamic variability analysis. Reaction directions are in  
768 the anabolic direction from  $\text{CO}_2$  on Figure 2, Figure 3. *Rnf*, *PFOR*, hydrogenase and *stn* are all calculated in the ferredoxin-  
769 consuming direction, and ATP synthase in the ATP-forming direction. *Pfl* is not shown for methylotrophic growth as it was  
770 not detected in the proteome.
